# Supplementary material for: Tocilizumab in Patients Hospitalized with COVID-19 Pneumonia: Systematic Review and Meta-Analysis of Randomized Controlled Trials
Source: HighWire-hosted journal article supplement (doi:10.1136/jim-2021-002001), 2021-09-24
Supplement: jim-2021-002001supp001_data_supplement.pdf [file jim-2021-002001supp001_data_supplement.pdf]

**Search Executed:** April 19, 2021

**Search Set Forwarded for Review: #10**

**Database:** EBM Reviews - Cochrane Database of Systematic Reviews <2005 to April 14, 2021>

**Search Strategy:**

- 
- 1 (2019-ncov\$ or 2019ncov\$ or ncov2019\$ or ncov-2019\$).af. (26)
  - 2 ((wuhan\$ or hubei\$) and corona\$).af. (41)
  - 3 (sars-cov-2\$ or sars-cov2\$ or sarscov2\$ or sars\$ corona\$ 2\$).af. (34)
  - 4 covid\$.af. (615)
  - 5 ((new\$ or novel\$ or pandemic\$ or epidemic\$) and corona\$).af. (1511)
  - 6 or/1-5 (1975)
  - 7 pneumonia\$.af. (1263)
  - 8 6 and 7 (264)
  - 9 (tocilizumab\$ or actemra\$ or altizumab\$ or lusinex\$ or r 1569\$ or r1569\$ or roactemra\$ or IL-6\$).af. (43)
  - 10 8 and 9 (7)

\*\*\*\*\*

**Search Executed:** April 19, 2021

**Search Set Forwarded for Review: #11**

**Database:** EBM Reviews - Cochrane Central Register of Controlled Trials <March 2021>

**Search Strategy:**

- 
- 1 (2019-ncov\$ or 2019ncov\$ or ncov2019\$ or ncov-2019\$).af. (135)
  - 2 ((wuhan\$ or hubei\$) and corona\$).af. (227)
  - 3 (sars-cov-2\$ or sars-cov2\$ or sarscov2\$ or sars\$ corona\$ 2\$).af. (2019)
  - 4 covid\$.af. (6062)
  - 5 ((new\$ or novel\$ or pandemic\$ or epidemic\$) and corona\$).af. (27659)
  - 6 or/1-5 (31145)
  - 7 pneumonia\$.af. (20359)
  - 8 6 and 7 (1434)
  - 9 (tocilizumab\$ or actemra\$ or altizumab\$ or lusinex\$ or r 1569\$ or r1569\$ or roactemra\$).af. (1413)
  - 10 8 and 9 (65)
  - 11 ..I/ 10 yr=2019-current (65)

\*\*\*\*\*

**Search Executed:** April 19, 2021

**Search Sets Forwarded for Review: #18 | #23 | #24**

**Database:** Embase Classic+Embase <1947 to 2021 April 16>

**Search Strategy:**

- 
- 1 coronavirus disease 2019/ (98924)
  - 2 (2019-ncov\$ or 2019ncov\$ or ncov2019\$ or ncov-2019\$).mp. (1699)
  - 3 ((wuhan\$ or hubei\$) and corona\$).mp. (5456)
  - 4 (sars-cov-2\$ or sars-cov2\$ or sarscov2\$ or sars\$ corona\$ 2\$).mp. (40829)
  - 5 covid\$.mp. (115788)

6 ((new\$ or novel\$ or pandemic\$ or epidemic\$) and corona\$.mp. (196742)  
7 or/1-6 (259308)  
8 exp pneumonia/ (343168)  
9 pneumonia\$.mp. (447874)  
10 8 or 9 (483491)  
11 7 and 10 (18788)  
12 tocilizumab/ (14102)  
13 (tocilizumab\$ or actemra\$ or altizumab\$ or lusinex\$ or r 1569\$ or r1569\$ or roactemra\$.mp. (14765)  
14 or/12-13 (14765)  
15 11 and 14 (607)  
16 ./ / 15 yr=2019-current (606)  
17 remove duplicates from 16 (591)  
**18 limit 17 to conference abstracts (74)**  
19 17 not 18 (517)  
20 \*tocilizumab/ (4289)  
21 (tocilizumab\$ or actemra\$ or altizumab\$ or lusinex\$ or r 1569\$ or r1569\$ or roactemra\$ or IL-6\$.ti,kw. (4692)**4708**  
22 20 or 21 (4966)  
**23 19 and 22 (215)**  
**24 19 not 23 (318)**

**Search Executed:** April 19, 2021 (Update of previous searches in this database completed on 2/18 and 3/4)

**Search Sets Forwarded for Review:** #18 | #19

**Database:** Ovid MEDLINE(R) and Epub Ahead of Print, In-Process, In-Data-Review & Other Non-Indexed Citations and Daily <1946 to April 16, 2021>

#### Search Strategy:

-----  
1 (covid19\$ or covid2019\$ or covid-19\$ or covid-2019\$.mp. (119960)  
2 (2019-ncov\$ or 2019ncov\$ or ncov2019\$ or ncov-2019\$.mp. (1688)  
3 ((wuhan\$ or hubei\$) and corona\$.mp. (4764)  
4 (sars-cov-2\$ or sars-cov2\$ or sarscov2\$ or sars\$ corona\$ 2\$.mp. (76998)  
5 (("2019" or "2020" or "2021") and (new\$ or novel\$ or pandemic\$ or epidemic\$) and corona\$.mp. (31164)  
6 or/1-5 (124705)  
7 exp Pneumonia/ (164824)  
8 pneumonia\$.mp. (259969)  
9 7 or 8 (293974)  
10 6 and 9 (74627)  
11 tocilizumab\$.mp. (4524)  
12 10 and 11 (774)  
13 ./ / 12 yr=2019-current (774)  
14 remove duplicates from 13 (765)  
15 limit 14 to (case reports or comment or editorial or letter or news) (239)  
16 14 not 15 (526)  
17 (system\$ review\$ or meta-analy\$ or metaanaly\$ or clinic\$ trial\$ or rct or rcts or (random\$ adj2 trial\$)).mp. (1736698)  
**18 16 and 17 (189)**  
**19 16 not 18 (337)**

\*\*\*\*\*
